# Supplementary material for: Application of the Interaction between Tissue Immunohistochemistry Staining and Clinicopathological Factors for Evaluating the Risk of Oral Cancer Progression by Hierarchical Clustering Analysis: A Case-Control Study in a Taiwanese Population
Source: MDPI journal article supplement (doi:10.3390/diagnostics11060925), 2021-05-21
Supplement: s1 [file s1]

### ***Ward's agglomerative hierarchical clustering***

Overall, 32 protein staining expressions from 102 patients were normalized and converted into a  $32 \times 102$  matrix. Agglomerative hierarchical clustering with Ward's method was used to cluster the protein staining expression matrix to build a hierarchy for included protein staining. Ward's agglomerative hierarchical clustering algorithm divided the protein staining expression into  $n$  partitions according to their similarity. Ward's agglomerative hierarchical clustering equation is shown in equations 1 and 2.

$$\Delta(A, B) = \sum_{i \in A \cup B} \|\vec{x} - \vec{m}_{A \cup B}\|^2 - \sum_{i \in A} \|\vec{x} - \vec{m}_A\|^2 - \sum_{i \in B} \|\vec{x} - \vec{m}_B\|^2 \quad (1)$$

$$= \frac{n_A n_B}{n_A + n_B} \|\vec{m}_A - \vec{m}_B\|^2 \quad (2)$$

where A and B indicate two different clusters,  $\vec{m}_A$  is the center of cluster A, and  $n_A$  is the number of objects within cluster A.  $\Delta$  is the merging cost of combining clusters A and B.

Silhouette analysis was used to estimate the optimal number of clusters for the input  $n \times m$  matrix by estimating the average distance between clusters. The silhouette index  $s_i$  measures the similarity between clusters and indicates whether the clustering configuration is appropriate.

$$b(i) = \min_{c \neq A} c(i, C) \quad (3)$$

where  $i$  is an object belonging to cluster A,  $C$  is a cluster not containing  $i$ , and  $c(i, C)$  is the average dissimilarity between  $i$  and all objects in  $C$ . Hence, the silhouette index  $s(i)$  is calculated as follows:

$$s(i) = \frac{b(i) - a(i)}{\max\{a(i), b(i)\}} \quad (4)$$

where  $a(i)$  is defined as the average dissimilarity between  $i$  and all other objects in A.

The protein staining hierarchical clustering was simply divided into three steps. We started with each object in a  $n \times m$  matrix. Second, we used the merge cost formula shown in equation 2 to ascertain the closest pair of clusters by merging the minimum merge cost objects. Third, the tree of cluster merges was returned and the second step was repeated until all objects were merged in the optimal number of clusters measured by the silhouette index in equation 4. Thus, each cluster  $C_j$  will include  $k$  number of hierarchy protein  $P$  with staining expression.

$$C_j = \{P_1, \dots, P_k\} \quad (5)$$

### OCPRS

Subsequently, patients were dichotomized into two strata by each cluster  $C_j$  using the agglomerative distance, as shown in equation 6.

$$D_k = \sum_{P \in C_j} \|P_k - M_k\| \quad (6)$$

where  $M_k$  is the mean vector of  $C_j$  strata and  $P$  is the  $k$  object in the vector of the protein staining matrix.

The proportion of disease progression subjects was computed and compared to determine the high- and low-risk strata. Thus, the mean vector of  $C_j$  in high- and low-risk strata was computed as equation 7.

$$M_k = \begin{cases} \bar{H} = \frac{\sum x_h}{n_h} \\ \bar{L} = \frac{\sum x_l}{n_l} \end{cases} \quad (7)$$

where  $\bar{H}$  is the protein staining mean score of high-risk strata, and  $\bar{L}$  is the protein staining mean score of low-risk strata.

Consequently, the agglomerative distance  $D_k$  for high- and low-risk strata was calculated using equations 8 and 9.

$$D_h = \sum_{k \in C_j} \|P_k - \bar{H}_k\| \quad (8)$$

where  $D_h$  is the agglomerative distance from the high-risk derived by the selected protein staining score combination in  $C_j$ .  $P$  is the  $k$  object in the vector of protein staining matrix, and  $\bar{H}_k$  is the protein staining mean score of high-risk strata in each of the proteins included in  $C_j$ .

$$D_l = \sum_{k \in C_j} \|P_k - \bar{L}_k\| \quad (9)$$

where  $D_l$  is the agglomerative distance from the low-risk derived by the selected protein staining score combination in  $C_j$ .  $P$  is the  $k$  object in the vector of protein staining matrix, and  $\bar{L}_k$  is the protein staining mean score of low-risk strata in each of the proteins included in  $C_j$ .

Hence, a risk stratification formula was derived to provide a rapid and convenient risk estimation using the protein staining expression in the cluster  $C_j$ . Each patient was dichotomized into high- and low-risk strata by comparing  $D_h$  and  $D_l$  as shown in equation 10.

$$\text{Risk stratification} = \begin{cases} \text{High risk, if } D_h < D_l \\ \text{Low risk, if } D_l < D_h \end{cases} \quad (10)$$

The results demonstrated that protein staining, including PLK1\_cy, PhosphoMet\_cy, and SGK2\_cy, could significantly predict oral cancer progression. Hence, a risk stratification formula was derived to provide a quick and simple risk estimation using PLK1\_cy, PhosphoMet\_cy, and SGK2\_cy staining results.

The agglomerative distance  $D_h$  for high-risk strata was computed as follows:

$$D_h = \|P_{\text{PLK1\_cy}} - \bar{H}_{\text{PLK1\_cy}}\| + \|P_{\text{PhosphoMet\_cy}} - \bar{H}_{\text{PhosphoMet\_cy}}\| + \|P_{\text{SGK2\_cy}} - \bar{H}_{\text{SGK2\_cy}}\| \quad (11)$$

The mean of PLK1\_cy, PhosphoMet\_cy, and SGK2\_cy in the high-risk cluster were 1.490, 0.962, and 0.981, respectively. Thus,  $D_h$  was computed as follows:

$$D_h = \|P_{\text{PLK1\_cy}} - 1.490\| + \|P_{\text{PhosphoMet\_cy}} - 0.962\| + \|P_{\text{SGK2\_cy}} - 0.981\| \quad (12)$$

The agglomerative distance  $D_l$  for low-risk strata was computed as follows:

$$D_l = \|P_{\text{PLK1\_cy}} - \bar{L}_{\text{PLK1\_cy}}\| + \|P_{\text{PhosphoMet\_cy}} - \bar{L}_{\text{PhosphoMet\_cy}}\| + \|P_{\text{SGK2\_cy}} - \bar{L}_{\text{SGK2\_cy}}\| \quad (13)$$

The mean of PLK1\_cy, PhosphoMet\_cy, and SGK2\_cy in the low-risk cluster were 2.310, 1.840, and 1.590, respectively. Thus,  $D_l$  was computed as follows.

$$D_l = \|P_{\text{PLK1\_cy}} - 2.310\| + \|P_{\text{PhosphoMet\_cy}} - 1.840\| + \|P_{\text{SGK2\_cy}} - 1.590\| \quad (14)$$

Lastly, each patient was dichotomized into high- and low-risk strata by comparing  $D_h$  and  $D_l$  using equation 10.

**Supplementary Figure S1.** IHC staining (magnification 400×) of 8th protein staining cluster and associated H&E images (magnification 200×) of high-risk and low-risk patients.

**High risk**

(a) PLK1 IHC staining (magnification 400×)

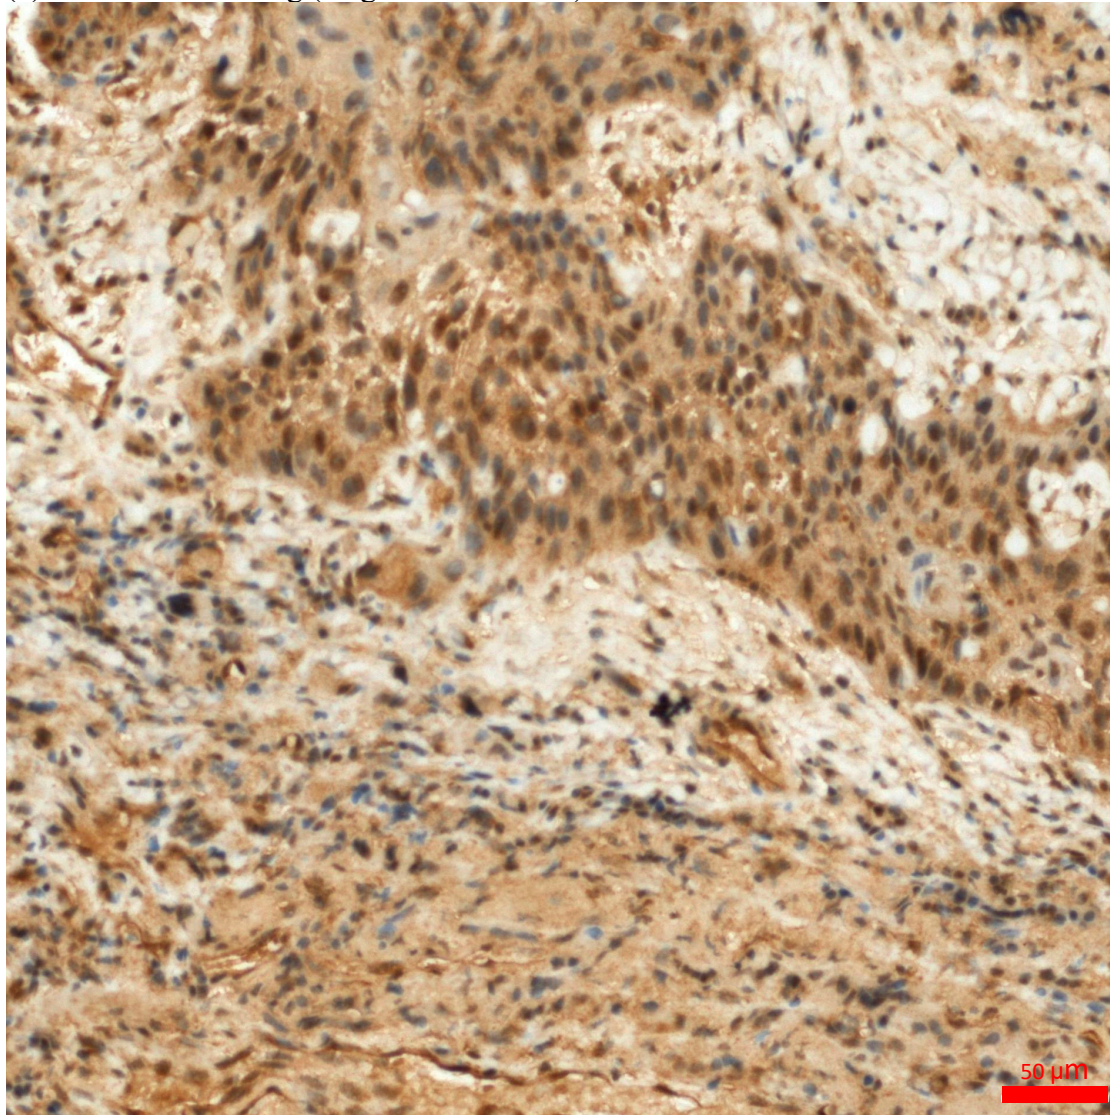



(b) phosphoMet IHC staining (magnification 400×)

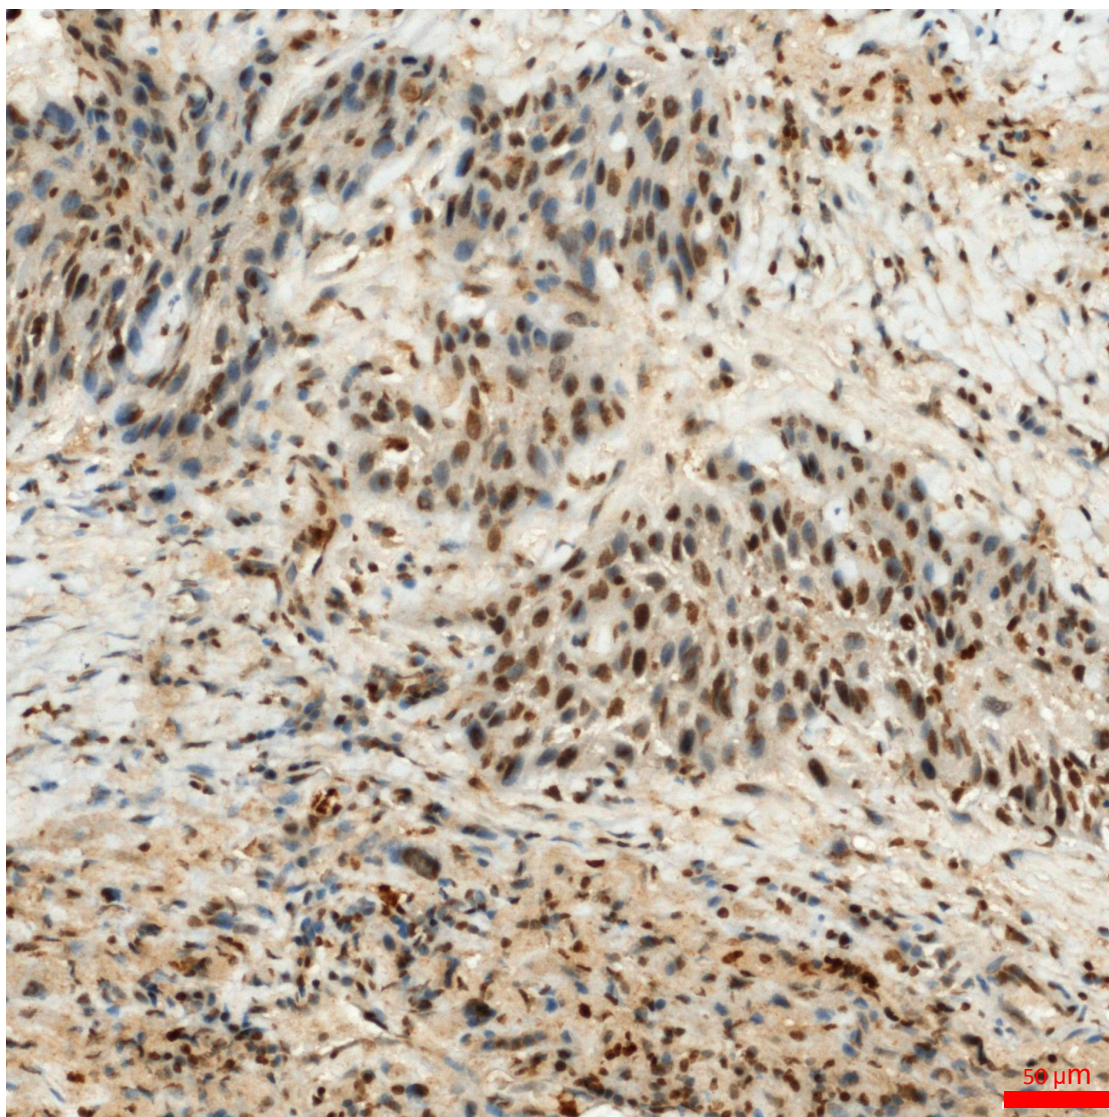

(c) SGK2 IHC staining (magnification 400×)

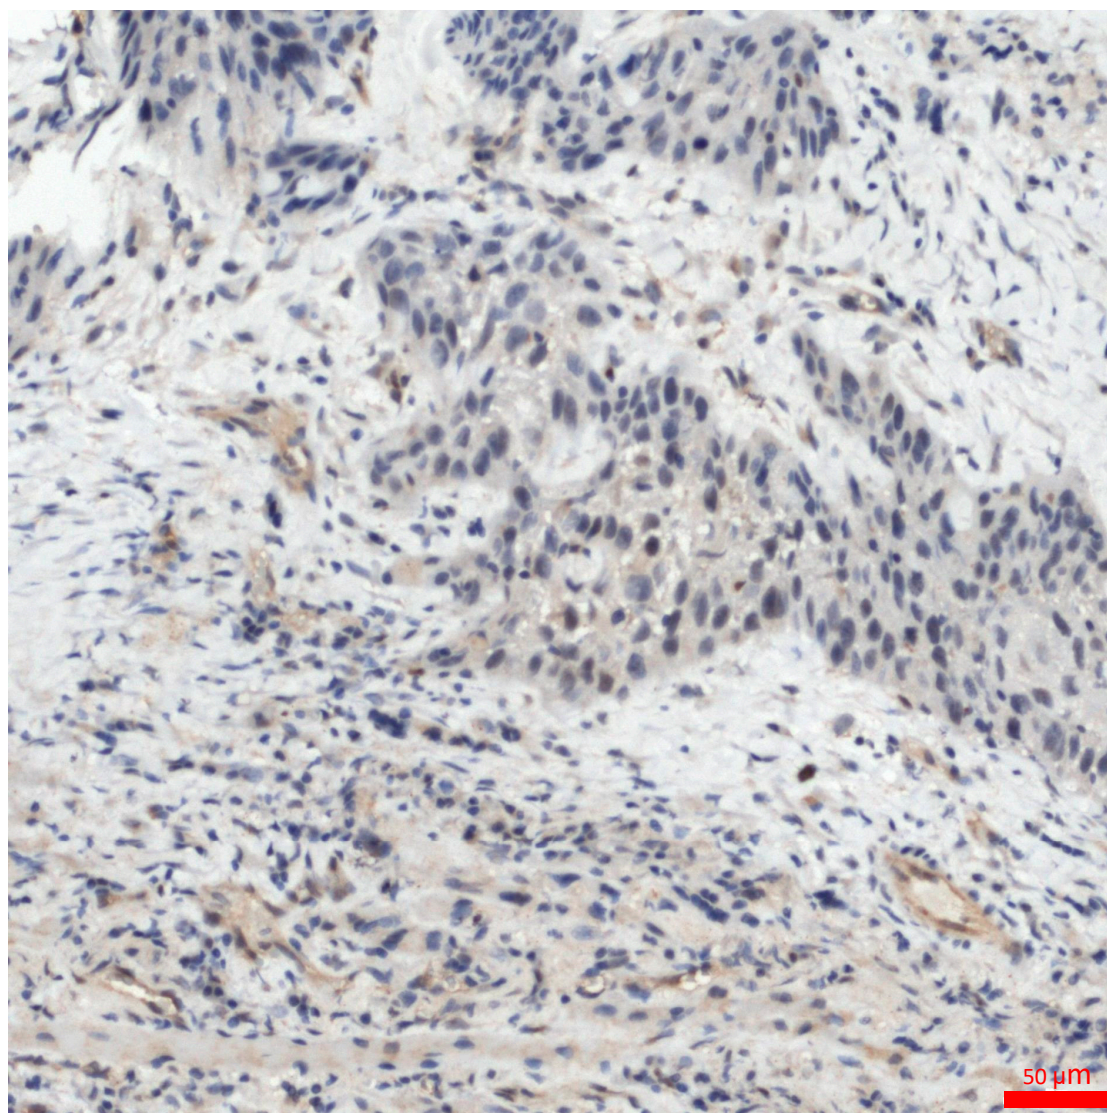



**(d)** Associated H&E images (magnification 200×)

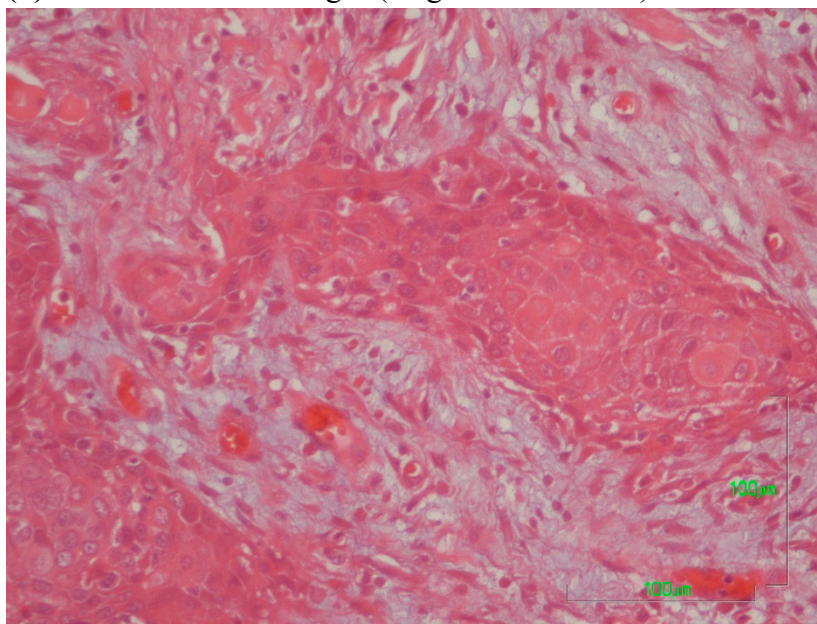

**Low risk**

(e) PLK1 IHC staining (magnification 400×)

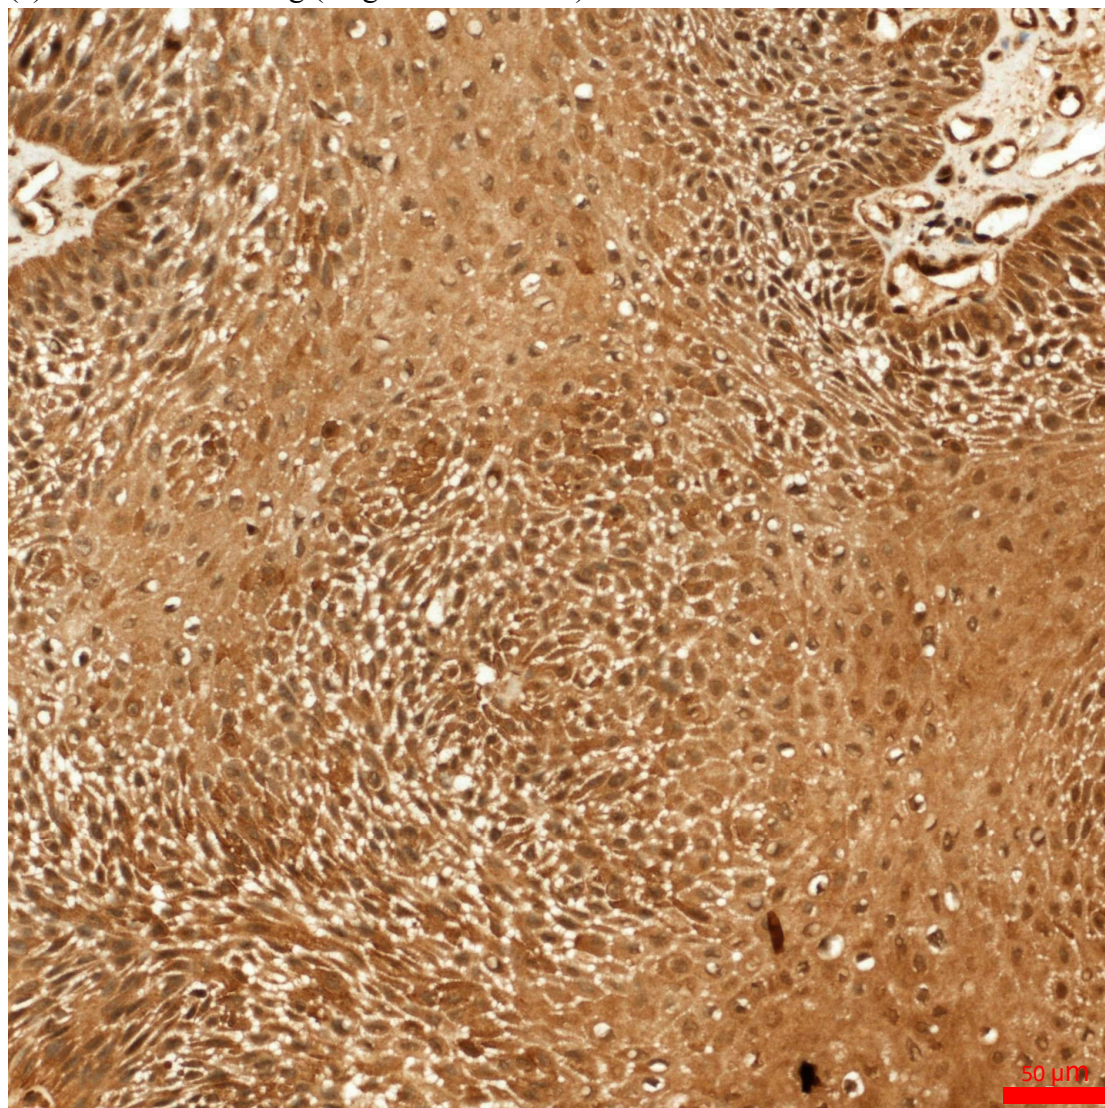



(f) phosphoMet IHC staining (magnification 400×)

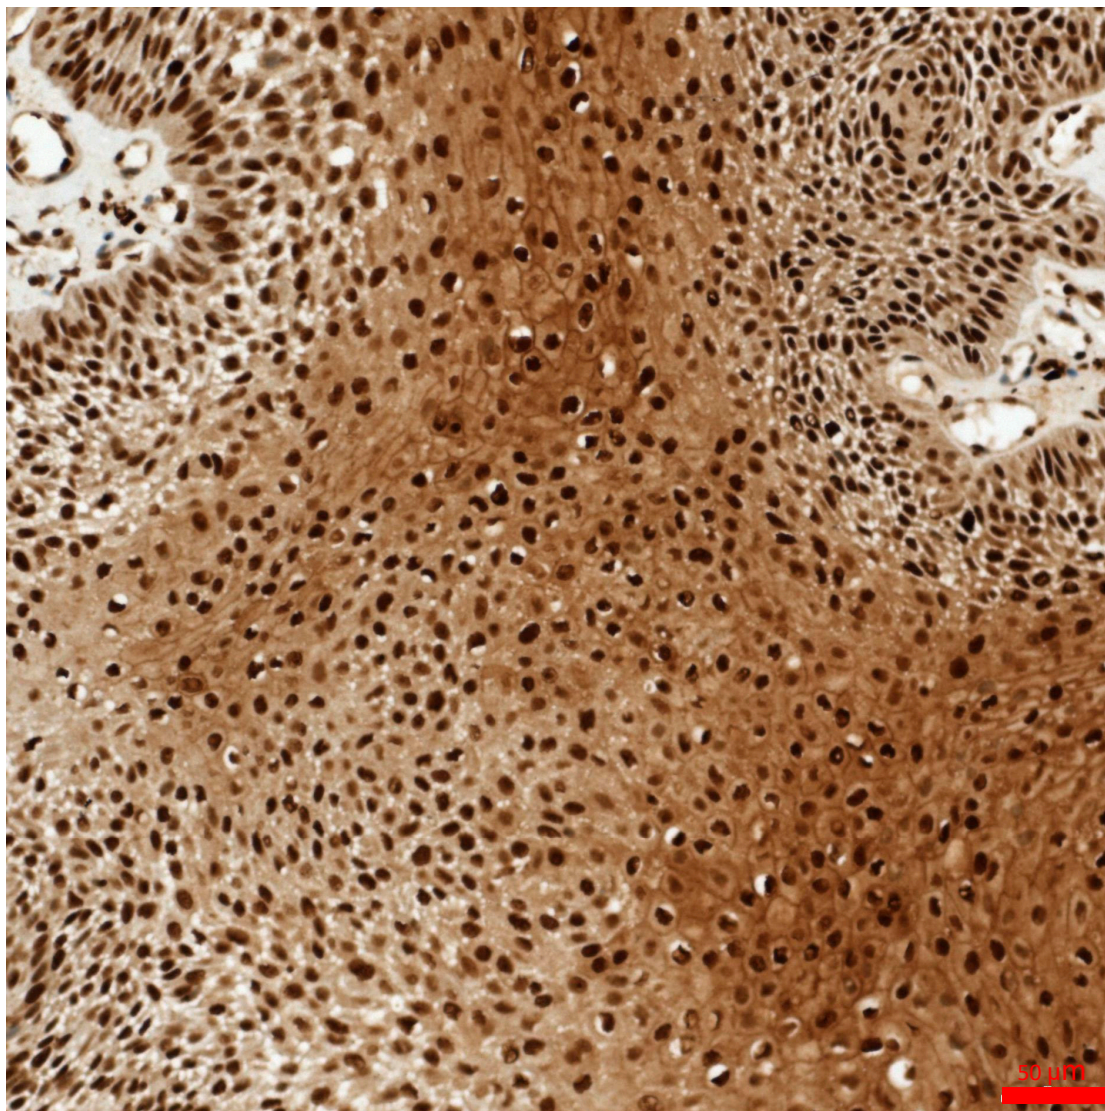



(g) SGK2 IHC staining (magnification 400×)

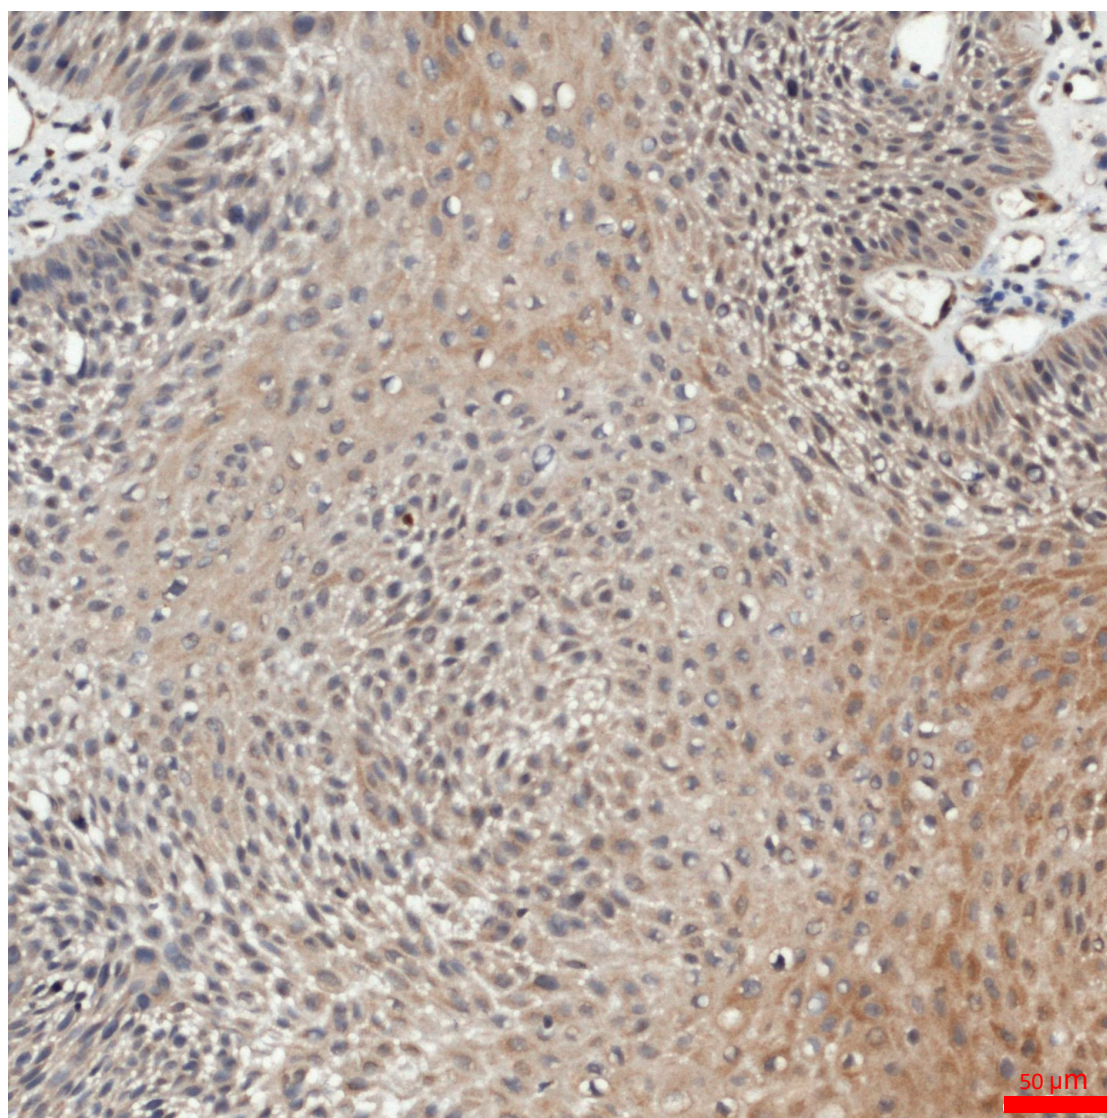

**(h)** Associated H&E images (magnification 200×)

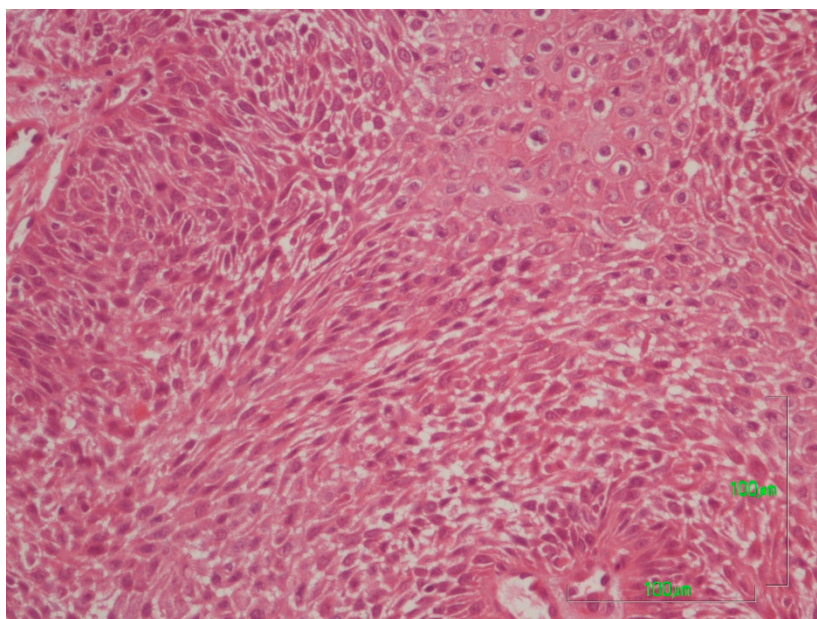



**Supplementary Table S1.** The antibodies and retrieval buffers for each protein.

| Protein Name | Clonality         | Source           | Catalogue number | Dilution | Retrieval buffer |
|--------------|-------------------|------------------|------------------|----------|------------------|
| BRCA1        | Mouse monoclonal  | Zeta Corporation | Z2237            | 1:100    | Tris-EDTA buffer |
| CDH3         | Rabbit polyclonal | Abgent           | AP1499B          | 1:50     | Tris-EDTA buffer |
| CDK6         | Rabbit monoclonal | Abcam Ltd        | ab124821         | 1:100    | Tris-EDTA buffer |
| CSNK1E       | Rabbit polyclonal | Abgent           | AP7403a          | 1:50     | Tris-EDTA buffer |
| EGFR         | Rabbit monoclonal | Zeta Corporation | Z2037            | 1:50     | Tris-EDTA buffer |
| FEN1         | Rabbit polyclonal | Abcam Ltd        | ab70815          | 1:1000   | Tris-EDTA buffer |
| FLNA         | Rabbit polyclonal | Abgent           | AP7770a          | 1:50     | Tris-EDTA buffer |
| KRAS         | Rabbit polyclonal | Abcam Ltd        | ab216890         | 1:200    | Citrate buffer   |
| MET          | Rabbit polyclonal | Abgent           | AP3167a          | 1:50     | Citrate buffer   |
| MSH2         | Mouse monoclonal  | Zeta Corporation | Z2129            | 1:100    | Tris-EDTA buffer |
| P16          | Mouse monoclonal  | BD biosciences   | 550834           | 1:100    | Tris-EDTA buffer |
| PARP1        | Rabbit monoclonal | Abcam Ltd        | Ab191217         | 1:500    | Tris-EDTA buffer |
| PIM1         | Rabbit polyclonal | Abgent           | AP7932d          | 1:50     | Tris-EDTA buffer |
| PLK1         | Rabbit polyclonal | Abgent           | AP7937a          | 1:100    | Citrate buffer   |
| POLB         | Rabbit polyclonal | Abgent           | AP50642          | 1:100    | Tris-EDTA buffer |
| RAD54B       | Rabbit polyclonal | Genetex          | GTX103291        | 1:500    | Tris-EDTA buffer |
| RB1          | Mouse monoclonal  | Leica Biosystems | NCL-L-RB-358     | 1:50     | Tris-EDTA buffer |
| SGK2         | Rabbit polyclonal | Abgent           | AP7947b          | 1:100    | Citrate buffer   |
| SHC1         | Rabbit polyclonal | Abgent           | AP50024          | 1:100    | Citrate buffer   |
| STK17A       | Rabbit polyclonal | Abcam Ltd        | ab97530          | 1:100    | Citrate buffer   |
| TP53         | Mouse monoclonal  | Leica Biosystems | NCL-L-p53-DO7    | 1:200    | Citrate buffer   |

**Supplementary Table S2.** Baseline characteristics according to identified protein cluster.

| Characteristics                | High-risk       | Low-risk       | <i>P</i>     |
|--------------------------------|-----------------|----------------|--------------|
| Cases                          | 53              | 49             |              |
| Age, mean $\pm$ SD             | 54.5 $\pm$ 11.2 | 55.8 $\pm$ 9.5 | 0.514        |
| Sex                            |                 |                | 0.102        |
| Female                         | 1 ( 1.9%)       | 5 ( 10.2%)     |              |
| Male                           | 52 ( 98.1%)     | 44 ( 89.8%)    |              |
| Alcohol                        | 34 ( 64.2%)     | 31 ( 63.3%)    | 1.000        |
| Betel                          | 40 ( 75.5%)     | 35 ( 71.4%)    | 0.812        |
| Cigarette                      | 48 ( 90.6%)     | 39 ( 79.6%)    | 0.199        |
| Site                           |                 |                | 0.500        |
| Non-buccal                     | 24 ( 45.3%)     | 18 ( 36.7%)    |              |
| Buccal                         | 29 ( 54.7%)     | 31 ( 63.3%)    |              |
| Grade                          |                 |                | 0.567        |
| 1                              | 23 ( 43.4%)     | 25 ( 51.0%)    |              |
| 2-3                            | 30 ( 56.6%)     | 24 ( 49.0%)    |              |
| LVI                            | 7 ( 13.2%)      | 3 ( 6.1%)      | 0.323        |
| PNI                            | 7 ( 13.2%)      | 6 ( 12.2%)     | 1.000        |
| Margin not free                | 3 ( 5.7%)       | 3 ( 6.1%)      | 1.000        |
| ENE                            | 5 ( 9.4%)       | 4 ( 8.2%)      | 1.000        |
| Tumor size (cm), mean $\pm$ SD | 2.6 $\pm$ 1.5   | 2.3 $\pm$ 1.4  | 0.278        |
| Lymph node invasion            |                 |                | 0.646        |
| Positive                       | 12 ( 22.6%)     | 14 ( 28.6%)    |              |
| Negative                       | 41 ( 77.4%)     | 35 ( 71.4%)    |              |
| Pathological stage             |                 |                | 0.629        |
| I-II                           | 36 ( 67.9%)     | 39 ( 79.6%)    |              |
| III-IV                         | 17 ( 32.1%)     | 10 ( 20.4%)    |              |
| Death                          | 17 ( 32.1%)     | 9 ( 18.4%)     | 0.174        |
| Progressed                     | 25 ( 47.2%)     | 11 ( 22.4%)    | <b>0.016</b> |

P-value is estimated using independent two-sampled t-test, chi-squared test or Fisher's exact test.

**Supplementary Table S3.** Comparison of the prediction ability of different protein location on overall mortality and disease-progressed.

| Protein    | Death        |          |          | Progression  |          |          |
|------------|--------------|----------|----------|--------------|----------|----------|
|            | nu/mem (AUC) | cy (AUC) | <i>P</i> | nu/mem (AUC) | cy (AUC) | <i>P</i> |
| P16        | 0.471        | 0.485    | 0.697    | 0.543        | 0.544    | 0.962    |
| RB1        | 0.554        | 0.500    | 0.359    | 0.518        | 0.500    | 0.744    |
| EGFR       | 0.474        | 0.494    | 0.728    | 0.425        | 0.523    | 0.053    |
| CDK6       | 0.489        | 0.481    | 0.893    | 0.496        | 0.508    | 0.839    |
| PhosphoMet | 0.426        | 0.500    | 0.179    | 0.469        | 0.500    | 0.552    |
| POLB       | 0.570        | 0.583    | 0.883    | 0.495        | 0.529    | 0.684    |
| SHC1       | 0.519        | 0.597    | 0.459    | 0.501        | 0.559    | 0.551    |
| CDH3       | 0.453        | 0.423    | 0.609    | 0.460        | 0.469    | 0.878    |
| STK17A     | 0.472        | 0.427    | 0.553    | 0.479        | 0.476    | 0.970    |
| PIM1       | 0.465        | 0.443    | 0.744    | 0.485        | 0.476    | 0.889    |
| FLNA       | 0.551        | 0.516    | 0.638    | 0.480        | 0.469    | 0.891    |
